1 **Dysgu: efficient structural variant calling using short or**  
2 **long reads**

3

4

5 Kez Cleal<sup>1\*</sup>, Duncan M. Baird<sup>1</sup>

6

7 <sup>1</sup> Division of Cancer and Genetics, School of Medicine, Cardiff University, Heath  
8 Park, Cardiff, CF14 4XN, UK.

9

10 \* To whom correspondence should be addressed: [clealk@cardiff.ac.uk](mailto:clealk@cardiff.ac.uk);

11 Correspondence may also be addressed to Duncan M Baird: [bairddm@cardiff.ac.uk](mailto:bairddm@cardiff.ac.uk)

12

13 **Keywords: structural variant, variant calling, genome rearrangement.**

14

15

## 16 Abstract

17

18 Structural variation (SV) plays a fundamental role in genome evolution and can  
19 underlie inherited or acquired diseases such as cancer. Long-read sequencing  
20 technologies have led to improvements in the characterization of structural variants  
21 (SVs), although paired-end sequencing offers better scalability. Here, we present  
22 *dysgu*, which calls SVs or indels using paired-end or long reads. *Dysgu* detects  
23 signals from alignment gaps, discordant and supplementary mappings, and  
24 generates consensus contigs, before classifying events using machine learning.  
25 Additional SVs are identified by remapping of anomalous sequences. *Dysgu*  
26 outperforms existing state-of-the-art tools using paired-end or long-reads, offering  
27 high sensitivity and precision whilst being among the fastest tools to run. We find that  
28 combining low coverage paired-end and long-reads is competitive in terms of  
29 performance with long-reads at higher coverage values.

30

## 31 Introduction

32

33 Analysis of structural variants (SVs) with whole genome or targeted enrichment  
34 sequencing is used in the clinic for diagnosing acquired or inherited genetic diseases  
35 (1) and for investigating mechanisms of genomic complexity in cancer and other  
36 pathologies (2–6). Sequencing using short paired-end reads (PE) is well established  
37 for genomic analysis due to mature workflows and low sequencing costs, although  
38 increasingly, long-read (LR) sequencing technologies are being utilized for these  
39 purposes. These LR sequencing platforms permit much longer read-lengths which  
40 can potentially lead to improvements in mapping to repetitive or complex regions of  
41 the reference genome, and advantages for detecting SVs. However, the better  
42 scalability of paired-end technologies, with further improvements in development (7),  
43 means that SV calling with shorter reads is likely to remain an area of interest.

44 SVs are usually defined as genomic rearrangement events over an arbitrary size of  
45 50 bp, falling into categories such as deletions (DEL), insertions (INS), duplications  
46 (DUP), inversions (INV) or translocations (TRA) (1). SVs below this threshold are  
47 often termed indels, although these can sometimes result from more complex events  
48 such as duplication, inversion or translocation. These labels are useful in  
49 conceptualizing simple genome rearrangements in terms of the reference genome  
50 structure, although complex SVs occurring in the germline or during cancer  
51 progression, can complicate interpretation.

52 SVs can be detected in sequencing data using a variety of methods. For PE data,  
53 single alignments only span relatively small within-read SVs (indels) due to limited  
54 read-length, so information of SVs must be gleaned from assessing discordant  
55 mappings, changes in read-depth and the occurrence of split-reads which straddle  
56 breaksites (8). Recent methods also employ de novo assembly of SV-derived reads  
57 and further rounds of SV discovery through re-mapping of derived contigs to the  
58 reference genome (9, 10)28/05/2021 07:05:00. Alignment free methods are also  
59 possible, by analysing differences in k-mer content between a sample and reference  
60 (11). For LR sequences, SVs up to several kb can be detected within alignments due  
61 to the long read-lengths involved, and split-reads, changes in read depth and  
62 assembly of SV-reads can be utilized (8).

63 A large number of bioinformatics tools have been developed for detecting SVs using  
64 PE or LR data, although recent benchmarking studies highlight that existing  
65 algorithms are often limited in their ability to detect all classes and sizes of SVs, and  
66 there is still considerable room for improvement (12–14). The approach of quality  
67 filtering of putative SVs also differs widely between tools. In the simplest case  
68 variants are filtered based on the weight of evidence or number of supporting reads,  
69 although choosing suitable thresholds can be difficult and higher read-depths have  
70 also been associated with false positives (13). Statistical methods for quality scoring  
71 have been employed, for example the PE caller Manta employs Bayesian inference  
72 using read fragments supporting an allele to estimate a likelihood, followed by  
73 manual filtering (9). The LR caller nanovar utilizes a neural network classifier trained  
74 on simulated datasets, where 14 input features of each putative SV are used to  
75 classify events (15). To build on these advances, we considered that performance  
76 may be enhanced from training using non-simulated datasets. Additionally, we  
77 identified that there is an unmet need for an SV caller capable of analysing both PE  
78 and LR datasets.

79 Here, we present our SV calling software dysgu, which can rapidly call SVs from PE  
80 or LR data, across all size categories. Conceptually, dysgu identifies SVs from  
81 alignment cigar information as well as discordant and split-read mappings. Dysgu  
82 employs a fast consensus sequence algorithm, inspired by the positional de Bruijn  
83 graph, followed by remapping of anomalous sequences to discover additional small  
84 SVs. A machine learning classifier is then employed to generate a useful quality  
85 score which can be used to prioritize variants.

86

87

## 88 Results

89 Dysgu is a general purpose *de novo* SV and indel caller that can analyse PE or LR  
90 sequencing datasets. SV-associated reads are first identified by assessing alignment  
91 gaps, split-read and discordant mappings, soft-clipped reads and read-depth  
92 changes. SV signals are clustered on a graph and contigs are generated for putative  
93 breakpoints. One-end anchored SVs - events with a single soft-clipped sequence  
94 without a corresponding mapping, are re-aligned to the reference genome to identify  
95 additional small SVs. Putative SV events are labelled with a rich set of features  
96 describing sequencing or mapping error metrics and supporting evidence. Events  
97 are further classified using a machine learning model to prioritise variants with higher  
98 probability.

99

### 100 Testing datasets

101 To assess precision and recall statistics we utilized benchmark datasets provided by  
102 the Genome in a Bottle (GIAB) consortium. Primarily, we assesses a germline call  
103 set derived from the Ashkenazi son sample (HG002) that combines five sequencing  
104 technologies and 68 call sets plus manual curation into a high quality and  
105 comprehensive benchmark (16). The HG002 benchmark is stratified into high  
106 confidence regions (Tier 1), where precision and recall can be confidently  
107 determined, as well as less confident regions (Tier 2, followed by 'all' regions) which  
108 potentially involve more complex genomic regions, or the completeness of the  
109 benchmark is uncertain. However, as only SVs  $\geq 50$  bp appear in Tier 1 regions, we  
110 also analysed all unfiltered SVs in the GIAB dataset which has a minimum SV size  
111 threshold  $\geq 20$  bp, appreciating that the 'All-regions' benchmark shows lower  
112 completeness compared to Tier 1 regions. In addition, we assessed recall on the  
113 HG001 cell line that has corresponding deletion calls ( $\geq 50$  bp) provided by GIAB  
114 (17). As the machine-learning classifier that dysgu employs was trained using calls  
115 derived from HG001 (see Methods), we did not assess precision using this dataset.

116

### 117 Performance using paired-end short reads

118 Dysgu was tested on HG002 at coverages of 20x (Figure 1, Table 1, 2,  
119 Supplemental\_Table\_S1.pdf) and 40x (Supplemental\_Fig\_S1.pdf,  
120 Supplemental\_Table\_S2.pdf - Supplemental\_Table\_S4.pdf) using Illumina 148 bp

121 paired-end reads. Performance was compared to the popular SV callers manta (9),  
122 delly (18), and lumpy (19). We also compared indel calling performance with strelka  
123 (20) and gatk down to a size of 30 bp. Strelka calls indels up to 50 bp whilst gatk  
124 calls deletions and insertions to around the insert size.

125

126 For Tier 1 SVs at 20x coverage, dysgu called the largest number of true deletions  
127 and insertions ( $n = 3894$ ), with 708 more variants called than the next best caller  
128 manta ( $n = 3186$ ) (Table 1). Precision-recall curves indicated that probability values  
129 estimated by dysgu using machine learning were useful for stratifying variants by  
130 quality, with higher probability values correlating with precision (Table 1A-D). Dysgu  
131 had the highest precision for deletion calls (95.6 %), as well as the highest recall for  
132 deletions (61.7 %) and insertions (23.8 %). Manta showed the highest precision for  
133 insertion variants (97.6 % vs dysgu 90.6 %) but had a lower recall (14.2 %) than  
134 dysgu. As a percentage value, dysgu called 7.9 % more deletions and 67 % more  
135 insertions than manta. Overall, dysgu showed higher F1 scores than the next best  
136 caller, manta, with an F1 score 4.2 % higher for deletions and 12.8 % higher for  
137 insertions. We also assessed the level of duplication, defined as the ratio of  
138 duplicated true-positive calls relative to unique true-positive calls. The problem of  
139 duplication arises when a single SV event leads to multiple calls in the output file.  
140 Generally, all PE callers displayed a low level of duplication below  $< 1.5\%$  (Table 1).

141

|       | TP   |      | FP  |     | Precision |       | Recall |       | Duplication |       | F1    |       |
|-------|------|------|-----|-----|-----------|-------|--------|-------|-------------|-------|-------|-------|
|       | DEL  | INS  | DEL | INS | DEL       | INS   | DEL    | INS   | DEL         | INS   | DEL   | INS   |
| dysgu | 2601 | 1293 | 119 | 134 | 0.956     | 0.906 | 0.617  | 0.238 | 0.001       | 0.012 | 0.750 | 0.377 |
| manta | 2411 | 775  | 187 | 19  | 0.928     | 0.976 | 0.572  | 0.142 | 0.000       | 0.008 | 0.708 | 0.249 |
| delly | 2178 | 58   | 536 | 0   | 0.803     | 1.000 | 0.517  | 0.011 | 0.001       | 0.000 | 0.629 | 0.021 |
| lumpy | 2037 |      | 350 |     | 0.853     |       | 0.483  |       | 0.001       |       | 0.617 |       |

142

143 Table 1. Performance using PE 20x data on the HG002 ‘Tier 1 regions’ benchmark.  
144 The numbers of deletion (DEL) and insertion (INS) variants are quantified.  
145 Duplication is defined as the ratio of duplicate true-positive calls to the number of  
146 true-positive calls. TP – true-positive, FP – false-positive. Best scores are shaded  
147 blue.

148

149 We also stratified variants by size using the All-regions benchmark to investigate  
 150 size constraints of SV calling (Table 2, Supplemental\_Table\_S4.pdf). For deletions in  
 151 the 30 – 50 bp range, dysgu showed similar performance to gatk with similar  
 152 precision, recall and F1 scores. For insertions in the 30 - 50 bp range, dysgu showed  
 153 higher precision (95.8 %) and recall (28.9 %) than strelka and gatk.

154

155 For SVs  $\geq 50$  bp, dysgu showed a good balance of precision and recall across all  
 156 size ranges with the highest F1 scores among callers (Table 2). For deletion SVs  
 157 dysgu generally displayed the highest precision but showed a lower recall for large  
 158 SVs. For example, delly showed a higher recall than dysgu for deletions  $\geq 5000$  bp  
 159 (41.1 % vs 33.7 %), but only had a precision of 34.4 % vs dysgu 94.8 %.

160 For insertion SVs, dysgu showed the highest recall, but manta displayed the best  
 161 precision of 98.2 %. Dysgu was the best caller for identifying loci with large insertions  
 162 ( $\geq 500$  bp) finding  $n=386$ , vs manta  $n=23$  and gatk  $n=49$ . However, as dysgu utilizes  
 163 insert size statistics to estimate large insertions length, calculated insertion sizes are  
 164 expected to be less accurate compared to *de novo* assembly-based callers such as  
 165 manta and gatk (data not shown).

|            |         | Precision |            |              |             | Recall    |            |              |             | F1        |            |              |             |
|------------|---------|-----------|------------|--------------|-------------|-----------|------------|--------------|-------------|-----------|------------|--------------|-------------|
|            |         | [30 - 50) | [50 - 500) | [500 - 5000) | $\geq 5000$ | [30 - 50) | [50 - 500) | [500 - 5000) | $\geq 5000$ | [30 - 50) | [50 - 500) | [500 - 5000) | $\geq 5000$ |
| Deletions  | dysgu   | 0.961     | 0.964      | 0.977        | 0.948       | 0.361     | 0.234      | 0.368        | 0.337       | 0.525     | 0.377      | 0.534        | 0.498       |
|            | manta   | 1.000     | 0.962      | 0.952        | 0.820       | 0.008     | 0.219      | 0.286        | 0.335       | 0.015     | 0.357      | 0.440        | 0.476       |
|            | gatk    | 0.962     | 0.929      | 1.000        |             | 0.361     | 0.105      | 0.001        |             | 0.525     | 0.189      | 0.002        |             |
|            | strelka | 0.980     | 1.000      |              |             | 0.262     | 0.003      |              |             | 0.413     | 0.005      |              |             |
|            | delly   | 0.964     | 0.886      | 0.744        | 0.344       | 0.242     | 0.164      | 0.377        | 0.411       | 0.387     | 0.276      | 0.500        | 0.375       |
|            | lumpy   | 0.895     | 0.916      | 0.720        | 0.299       | 0.002     | 0.148      | 0.378        | 0.409       | 0.004     | 0.255      | 0.496        | 0.345       |
| Insertions | dysgu   | 0.958     | 0.909      | 1.000        | 1.000       | 0.289     | 0.144      | 0.108        | 0.111       | 0.444     | 0.249      | 0.195        | 0.199       |
|            | manta   | 0.989     | 0.982      | 1.000        |             | 0.012     | 0.100      | 0.007        |             | 0.023     | 0.182      | 0.014        |             |
|            | gatk    | 0.922     | 0.908      | 1.000        | 1.000       | 0.250     | 0.101      | 0.014        | 0.028       | 0.393     | 0.182      | 0.027        | 0.054       |
|            | strelka | 0.880     | 0.938      | 1.000        |             | 0.225     | 0.006      | 0.003        |             | 0.358     | 0.013      | 0.005        |             |
|            | delly   | 0.972     | 1.000      |              |             | 0.057     | 0.006      |              |             | 0.108     | 0.012      |              |             |

166

167 Table 2. SV calling stratified by size using PE 20x data on the HG002 the 'All-  
 168 regions' benchmark. Best scores are shaded blue.

169

170 At 40x coverage, all callers displayed improved recall and F1 scores although at the  
171 expense of lower precision (Supplemental\_Fig\_S1.pdf, Supplemental\_Table\_S2.pdf  
172 - Supplemental\_Table\_S4.pdf). Interestingly, this phenomenon was also reported in  
173 a recent benchmarking study suggesting that at higher coverage values, absolute  
174 numbers of sequencing and mapping artifacts are more likely to be mistaken for SV  
175 events with low allelic fraction (12). Overall, at 40x coverage dysgu maintained a  
176 good balance of precision and recall compared to other callers, in line with 20x  
177 coverage, showing the highest F1 score for deletions and insertion calls.

178

179 We next investigated the intersection of variant calls between tools, or the set of SVs  
180 shared between tools, and displayed results using an upset plot (Figure 1E, F),  
181 which quantifies the sizes of SV call sets, their intersections, and aggregates of  
182 intersections (21). Assessing Tier 1 SVs in the HG002 benchmark, dysgu showed  
183 the largest number of unique calls (both deletions n=154, and insertions n=815)  
184 followed by manta (n=135 deletions, n=295 insertions). Including indel callers and  
185 analysing all SVs changed the conclusion slightly. In this case, gatk found the most  
186 unique deletions events (n=1928, vs dysgu n=622) and the second highest number  
187 of unique insertion events (n=1610 after dysgu n=1800).

188

189 Recent studies have investigated combining the output of different SV callers to  
190 boost performance (22–24). To gauge the performance of different combinations of  
191 callers we assessed the union of true positive calls (labelled as concordant) and  
192 compare with the sum of false positives (labelled non-concordant) as a proxy for the  
193 false positive rate (Figure 1G, H). The best combination of callers using the All-  
194 regions benchmark appeared to be dysgu and gatk which together found 3069  
195 deletions and 4368 insertions absent from other callers.

196

197 We additionally tested the recall of tools against the HG001 deletion call set,  
198 comparing unfiltered variants for all callers. Dysgu demonstrated the highest recall  
199 (93.61%), followed by manta (89.84 %), delly (84.38 %) and lumpy (81.61 %).

200

201 To summarise, using PE data, dysgu was generally the most performant tool  
202 showing a good balance of precision and recall across SV types and size ranges.

203



## 204 Performance using long reads

205 We tested dysgu against the HG002 benchmark using PacBio HiFi reads at  
 206 approximately 8x (Figure 2, Tables 3-4, Supplemental\_Fig\_S2.pdf,  
 207 Supplemental\_Table\_S5.pdf - Supplemental\_Table\_S8.pdf) and 15x coverage  
 208 (Supplemental\_Fig\_S3.pdf, Supplemental\_Table\_S9.pdf -  
 209 Supplemental\_Table\_14.pdf), and using Oxford nanopore reads at 13x coverage  
 210 (Supplemental\_Fig\_S4.pdf, Supplemental\_Table\_S15.pdf -  
 211 Supplemental\_Table\_S20.pdf). Performance was compared against recently  
 212 published LR callers nanovar (15), sniffles (25) and svim (26), using reads aligned by  
 213 minimap2 (27) (Figures 2, Table 3 - 4), or ngmlr (25) (Supplemental\_Fig\_S2.pdf,  
 214 Supplemental\_Table\_S5.pdf). Aligning reads using ngmlr tended to give slightly  
 215 higher precision among all SV callers although F1 scores were also slightly reduced,  
 216 particularly for insertion variants (Supplemental\_Table\_S5.pdf -  
 217 Supplemental\_Table\_S7.pdf).

218

219 Assessing Tier 1 SVs from the HG002 benchmark, dysgu had the highest recall for  
 220 deletions (91.8 %) and insertions (89.4 %) and the highest precision for insertion  
 221 calls (95.4 %). Dysgu also had the highest F1 score for deletions (0.937) and  
 222 insertions (0.923) but was closely followed by nanovar with F1 scores of 0.922 and  
 223 0.898 for deletions and insertions, respectively (Figure 2 and Table 3).

224

|          | TP   |      | FP  |     | Precision |       | Recall |       | Duplication |       | F1    |       |
|----------|------|------|-----|-----|-----------|-------|--------|-------|-------------|-------|-------|-------|
|          | DEL  | INS  | DEL | INS | DEL       | INS   | DEL    | INS   | DEL         | INS   | DEL   | INS   |
| dysgu    | 3869 | 4868 | 177 | 235 | 0.956     | 0.954 | 0.918  | 0.894 | 0.015       | 0.018 | 0.937 | 0.923 |
| nanovar  | 3740 | 4643 | 153 | 261 | 0.961     | 0.947 | 0.887  | 0.853 | 0.029       | 0.055 | 0.922 | 0.898 |
| svim     | 3827 | 4827 | 509 | 562 | 0.883     | 0.896 | 0.908  | 0.887 | 0.017       | 0.062 | 0.895 | 0.891 |
| sniffles | 3251 | 4680 | 470 | 277 | 0.874     | 0.944 | 0.771  | 0.860 | 0.011       | 0.006 | 0.819 | 0.900 |

225

226 Table 3. Performance using PacBio Sequel II reads at 8x coverage on HG002 Tier 1  
 227 regions. Duplication is defined as the ratio of duplicate true-positive calls to the  
 228 number of true-positive calls. TP – true-positive, FP – false-positive. Best scores are  
 229 shaded blue.

230

231 Expanding the testing set to all regions and a minimum size of 30 bp, svim showed  
 232 the highest recall (0.334 for deletions and 0.403 for insertions)

233 (Supplemental\_Table\_S6.pdf - Supplemental\_Table\_S7.pdf). Dysgu and nanovar  
 234 displayed similar precision scores, but overall dysgu displayed the highest F1 scores  
 235 (0.482 for deletions and 0.537 for insertions) (Supplemental\_Table\_S6.pdf). Svim  
 236 showed marginally lower F1 scores (0.475 for deletions and 0.534 for insertions),  
 237 although we noticed that svim showed a higher level of duplication. Additionally, for  
 238 some callers this problem was more acute when analysing Oxford nanopore reads,  
 239 with for example, svim showing a duplication ratio of 0.58 for insertion calls in Tier 1  
 240 regions (Supplemental\_Figure\_S4.pdf, Supplemental\_Table\_S15.pdf). Among  
 241 callers, sniffles and dysgu generally showed the lowest duplication rates, although  
 242 dysgu had a consistently higher recall.  
 243

|            |          | Precision |           |             |       | Recall   |           |             |       | F1       |           |             |       |
|------------|----------|-----------|-----------|-------------|-------|----------|-----------|-------------|-------|----------|-----------|-------------|-------|
|            |          | [30, 50)  | [50, 500) | [500, 5000) | ≥5000 | [30, 50) | [50, 500) | [500, 5000) | ≥5000 | [30, 50) | [50, 500) | [500, 5000) | ≥5000 |
| Deletions  | dysgu    | 0.932     | 0.930     | 0.939       | 0.929 | 0.551    | 0.505     | 0.438       | 0.321 | 0.693    | 0.654     | 0.597       | 0.477 |
|            | nanovar  | 0.939     | 0.933     | 0.882       | 0.730 | 0.504    | 0.475     | 0.443       | 0.354 | 0.656    | 0.629     | 0.590       | 0.477 |
|            | svim     | 0.850     | 0.786     | 0.835       | 0.925 | 0.565    | 0.519     | 0.434       | 0.276 | 0.679    | 0.625     | 0.571       | 0.425 |
|            | sniffles | 0.920     | 0.875     | 0.636       | 0.411 | 0.261    | 0.362     | 0.440       | 0.354 | 0.407    | 0.512     | 0.520       | 0.380 |
| Insertions | dysgu    | 0.829     | 0.861     | 0.946       | 0.887 | 0.566    | 0.589     | 0.509       | 0.249 | 0.672    | 0.699     | 0.662       | 0.389 |
|            | nanovar  | 0.843     | 0.874     | 0.887       | 0.364 | 0.531    | 0.569     | 0.506       | 0.126 | 0.651    | 0.690     | 0.644       | 0.188 |
|            | svim     | 0.765     | 0.759     | 0.904       | 0.961 | 0.585    | 0.609     | 0.524       | 0.194 | 0.663    | 0.676     | 0.664       | 0.322 |
|            | sniffles | 0.854     | 0.864     | 0.877       | 0.852 | 0.452    | 0.541     | 0.469       | 0.182 | 0.591    | 0.665     | 0.611       | 0.300 |

244

245 Table 4. Long-read performance as a function of SV size. PacBio Sequel II reads at  
 246 8x coverage were assessed using the HG002 'all-regions' benchmark. Best scores  
 247 are shaded blue.

248

249 Analysing the intersection of SVs, we found that most callers seemed to identify  
 250 similar sets of SVs indicating that combining SV callers might only lead to small  
 251 gains in sensitivity (Figure 2E-H).

252 Similar to Illumina data, increasing the coverage of PacBio HiFi data increased the  
 253 recall of SV callers and F1 scores, but at the expense of reduced precision. At 15x  
 254 coverage, dysgu had the highest F1 scores for deletions and insertions for Tier 1,  
 255 whilst showing a low level of duplication (Supplemental\_Table\_S9.pdf). Sensitivity of  
 256 SV detection was also assessed using the HG001 deletion benchmark (≥ 50 bp in size).

257 Using PacBio reads at 5x coverage dysgu showed the highest recall (77.35 %)  
258 compared to other callers (nanovar 75.97, sniffles 70.52, svim 73.73 %). Likewise,  
259 dysgu showed the highest recall using 13x ONT reads (96.41 %) compared to other  
260 callers (nanovar 91.67, sniffles 95.89, svim 95.25 %).

261 In summary, dysgu demonstrated a high level of performance of LR datasets, with  
262 generally the best balance of precision and recall across SV sizes and categories.

263

#### 264 [Combining short and long reads for improved performance](#)

265 Dysgu supports merging of SVs from different runs using a 'merge' command  
266 making it trivial to integrate calls from different sequencing technologies. After  
267 merging, additional tags are added to the output file corresponding to the maximum  
268 and mean probability across samples, with the probability determined by the  
269 machine learning classifier.

270 We used dysgu to assess different combinations of sequencing technology including  
271 PacBio (8x and 15x), ONT (13x) and Illumina paired-end reads (20x and 40x), by  
272 filtering calls with a maximum model probability  $\geq 0.5$  for PacBio, or  $\geq 0.35$  for ONT  
273 combinations (Table 5). Testing against the All-regions benchmark, the addition of  
274 Illumina reads consistently led to performance improvements when combined with  
275 PacBio or ONT, especially for deletion calls (Table 5). The largest increases in recall  
276 were seen from adding 40x Illumina calls, although 20x Illumina calls also led to  
277 noticeable increases. For example, adding 40x Illumina calls to 8x PacBio calls  
278 identified an additional 1010 deletions and 1103 insertions for the All-regions  
279 benchmark, or 141 deletions and 85 insertions for Tier 1 regions. F1 scores  
280 improved for the All-regions benchmark, increasing by 2.77 % for deletions and 2.57  
281 % for insertions. Surprisingly, combining Illumina calls with PacBio 8x, appeared to  
282 be similar in performance to PacBio calls at a higher coverage value 15x.

283

284

285

286

287

288

289

290

|                   | TP    |       | Precision |       | Recall |       | Duplication |       | F1    |       |
|-------------------|-------|-------|-----------|-------|--------|-------|-------------|-------|-------|-------|
|                   | DEL   | INS   | DEL       | INS   | DEL    | INS   | DEL         | INS   | DEL   | INS   |
| pb 8x             | 12132 | 14207 | 0.935     | 0.872 | 0.325  | 0.389 | 0.033       | 0.040 | 0.482 | 0.538 |
| pb 8x + ill 20x   | 12996 | 14882 | 0.926     | 0.867 | 0.348  | 0.407 | 0.054       | 0.050 | 0.505 | 0.554 |
| pb 8x + ill 40x   | 13465 | 15342 | 0.915     | 0.861 | 0.360  | 0.420 | 0.065       | 0.055 | 0.517 | 0.564 |
| pb 15x            | 12814 | 15156 | 0.932     | 0.869 | 0.343  | 0.415 | 0.034       | 0.042 | 0.501 | 0.561 |
| pb 15x + ill 20x  | 13400 | 15626 | 0.922     | 0.863 | 0.358  | 0.427 | 0.056       | 0.052 | 0.516 | 0.572 |
| pb 15x + ill 40x  | 13778 | 15955 | 0.911     | 0.857 | 0.369  | 0.436 | 0.069       | 0.056 | 0.525 | 0.578 |
| ont 13x           | 13568 | 13506 | 0.892     | 0.869 | 0.363  | 0.369 | 0.039       | 0.034 | 0.516 | 0.518 |
| ont 13x + ill 20x | 14608 | 14825 | 0.880     | 0.854 | 0.391  | 0.405 | 0.060       | 0.112 | 0.541 | 0.550 |
| ont 13x + ill 40x | 15141 | 15585 | 0.865     | 0.830 | 0.405  | 0.426 | 0.071       | 0.137 | 0.552 | 0.563 |
| ont 13x + pb 8x   | 14876 | 15717 | 0.861     | 0.822 | 0.398  | 0.430 | 0.102       | 0.161 | 0.544 | 0.564 |

291

292 Table 5. Performance of combinations of sequencing platforms using the HG002 ‘all-  
 293 regions’ benchmark. pb – PacBio, ill – Illumina, ont – Oxford Nanopore  
 294 Technologies. Best scores are shaded blue.

295

296 However, Tier 1 regions generally did not show increased F1 scores despite  
 297 increased recall, which was caused by an inflation of the false-positives rate  
 298 (Supplemental\_Table\_S21.pdf). Additionally, we assessed Tier 1+2 regions which  
 299 include more complicated genomic loci than Tier 1. Tier 1+2 regions also showed  
 300 improved F1 scores, with 8x PacBio + 40x Illumina F1 scores increasing by 3.0  
 301 points for deletions and 1.9 for insertions (Supplemental\_Table\_S22.pdf). We  
 302 speculate that Illumina data may enhance SV calling at complicated genomic regions  
 303 that are not trivial to map for LR mappers. Additionally, PE data may help fill-in the  
 304 gaps for LR datasets in regions of low or zero coverage.

305 Combining sequencing technologies for improved SV discovery has not received  
 306 much attention, although with the increasing prevalence of LR sequencing, and other  
 307 non-standard techniques such as linked-read or HiC, we suggest that this would be  
 308 an interesting avenue for future research.

309

### 310 Runtime

311 We tested runtime using an Intel(R) Xeon(R) CPU E5-2680 v3 @ 2.50GHz Linux  
 312 machine with 256 GB of system memory. For Illumina data, dysgu was the fastest  
 313 tool using a single-core, analysing 40x coverage data in 75 mins and using 5.6 GB

314 memory (Table 6), which was almost twice as quick as the next fastest tool, delly.  
315 Manta was 4.85 times slower than dysgu to run on a single core, but used the least  
316 memory (0.244), and can also be run in parallel efficiently (data not shown). For  
317 PacBio HiFi reads analysed on a single core, dysgu was the second fastest tool after  
318 svim, analysing 8x coverage sample in 8 mins and using 0.35 GB memory,  
319 compared to 6.6 mins for svim and 0.34 GB memory. ONT reads at 13x coverage  
320 were analysing by dysgu in 59 mins using 0.94 GB memory, which was slower than  
321 the fastest caller svim (32 mins and 0.9 GB memory).

322

323

| Reads        | Caller   | Mins  | Mem (GB) |
|--------------|----------|-------|----------|
| Illumina 40X | dysgu    | 75.3  | 5.58     |
|              | manta    | 365.1 | 0.24     |
|              | delly    | 150.0 | 6.42     |
|              | lumpy    | 211.5 | 12.00    |
| PacBio 8X    | dysgu    | 8.0   | 0.35     |
|              | nanovar  | 46.5  | 19.05    |
|              | svim     | 6.6   | 0.34     |
|              | sniffles | 20.3  | 0.71     |
| ONT 13X      | dysgu    | 59.7  | 0.94     |
|              | nanovar  | 83.4  | 17.58    |
|              | svim     | 32.4  | 0.90     |
|              | sniffles | 64.6  | 2.01     |

324

325 Table 6. Resource requirements of SV callers. Best scores are shaded blue.

326

327

## 328 Discussion

329 We developed dysgu to facilitate SV and indel discovery using PE or LR sequencing  
330 platforms in a computationally efficient manner. Dysgu analyses several forms of  
331 evidence to detect events including alignment gaps, discordant reads, read-depth,  
332 soft-clipped and supplementary mappings. For PE data, remapping of anomalous  
333 soft-clipped reads is also utilized to identify additional small SVs. Putative events are  
334 then labelled with a useful probability value using a gradient boosting classifier (28).

335 Stratifying events by probability has several potential benefits over manually filtering.  
336 For example, machine learning classifiers can learn non-linear relationships between  
337 variables, and potentially capture large numbers of interactions between variables  
338 that would be difficult to reproduce through a manual approach. However, machine-  
339 learning raises additional challenges such as feature engineering, collation of  
340 appropriate training sets, and assessing how well a model will generalize to new  
341 data.

342 Dysgu models SV events using a vector of up to 41 features depending on read-  
343 type, with each feature designed to quantify different aspects of an SV signature, or  
344 error patterns of the respective read-type. The current list of features is non-  
345 exhaustive and can potentially be expanded in future releases to enhance calling  
346 performance.

347 Features incorporate more obvious signals such as read-support and sequencing  
348 depth, as well as novel patterns such as “soft-clip quality correlation” (PE data only)  
349 and repetitiveness scores (See Methods). To facilitate the calculation of features  
350 which capture sequence-contextual information, we also developed a novel linear-  
351 time consensus sequence algorithm, which is used to rapidly collapse reads at each  
352 break site into consensus contigs for further analysis. We trained our classifier using  
353 a large collection of manually labelled SV loci and combined these sites with loci  
354 identified by other SV callers. Manually labelling induces an obvious bias in the  
355 training set, where the correctness is a matter of opinion of the human observer.  
356 However, using a manual approach also allowed us to generate training sets with  
357 high completeness, which was not the case when relying on third party SV callers.  
358 Construction of quality training sets is a perennial challenge in machine learning and  
359 we expect that improving the quality and size of training sets will yield further  
360 performance improvements for SV classification.

361 We validated performance using benchmark datasets provided by GIAB (16, 17),  
362 and provide a software library 'svbench' to facilitate benchmarking and exploration of  
363 results. Primarily we assessed the HG002 benchmark, analysing in detail high-  
364 confidence Tier 1 regions, as well as all genomic regions. At Tier 1 regions we find  
365 that dysgu outperforms existing tools for both PE reads (Table 1) or third generation  
366 long-reads (Table 3,) using the F1 metric for comparisons. Tier 1 regions cover 2.51  
367 Gbps of the genome although more complicated regions and smaller indel SVs (< 50  
368 bp) are absent. Analysis of all genomic regions largely supported the conclusion that  
369 dysgu matches or outperforms existing tools, with dysgu often showing the best F1  
370 scores across read types (Supplemental\_Table\_S6.pdf,  
371 Supplemental\_Table\_S7.pdf). Notably, svim showed higher F1 scores than dysgu in  
372 some benchmarks, although this was at the expense of considerably lower precision  
373 values and often increased duplication of true-positives.

374 Another novel feature of dysgu is that calls from separate sequencing technologies  
375 can be merged using a single command. Particularly, we found that adding calls  
376 made using Illumina data to either PacBio or ONT led to improved recall (Table 5).  
377 However, this appeared to occur mainly outside Tier 1 regions, suggesting Tier 1  
378 regions are an 'easy-case' for LR platforms. Nevertheless, for applications that  
379 require higher recall, adding PE data to lower coverage LR data is a cost-effective  
380 approach for SV discovery that dysgu can support.

381 In conclusion, dysgu is de novo SV caller that outperforms existing tools using PE or  
382 LR datasets.

383 Dysgu is also computationally efficient to run, being the fastest tool using PE data, or  
384 second fastest using LR data. We provide dysgu as an open-source package for use  
385 in basic and applied research applications.

386

## 387 Materials and methods

### 388 Overview

389 Dysgu has been designed to work with aligned reads in BAM or CRAM formats, and  
390 can analyse PE reads with lengths in the range 100 – 250 bp, or single-end LR such  
391 as PacBio Sequel II, or ONT. By default, events with a minimum size of  $\geq 30$  bp are  
392 reported. Depending on the sequencing platform, dysgu offers pre-set options which  
393 apply recommended settings and a specific machine learning model (e.g. use ‘--  
394 mode pe’ or ‘--mode pacbio’ for PE or PacBio settings, respectively).

395 Dysgu provides a ‘run’ command which will produce a vcf file for a single input file,  
396 which is recommended for PE reads. However, depending on read-type the stages  
397 of the pipeline can differ. For PE reads (and optionally long reads), dysgu first  
398 partitions SV candidate reads into a temporary uncompressed bam file, which is  
399 achieved using the ‘fetch’ command. As this stage is time-consuming, this command  
400 can also be run in a stream during BAM file processing to further save wall runtime.  
401 Dysgu will then apply the ‘call’ command to SV candidate reads and produce an  
402 output. Depending on the length of input reads, the ‘fetch’ command may be  
403 redundant, as for very long reads such as ONT, a large proportion of reads harbour  
404 multiple SV candidates, which effectively leads to the input file being duplicated.  
405 Therefore the ‘fetch’ command is not needed for some LR datasets, and the ‘call’  
406 command is recommended instead.

407

### 408 Identifying SV candidate reads

409 For PE reads, library insert metrics are collected from the input file by scanning the  
410 first  $200 \times 10^3$  reads. If the ‘fetch’ command is utilized, single reads, or all alignments  
411 from a read-pair, that are deemed to be candidates, are partitioned into a temporary  
412 file. However, if the ‘fetch’ command is not run, then input reads are simply marked  
413 as SV candidates. A read is defined as a candidate if a read is found with either,  
414 map-quality  $\geq 20$ , a soft-clip  $\geq 15$  bp (PE only), a discordant insert size or read  
415 orientation (PE only), a supplementary mapping, an alignment gap  $\geq 30$ , or a mate  
416 on another chromosome. A discordant insert size is defined as  $insert\ size \geq$   
417  $insert\ median + (5 \cdot insert\ stdev)$ . Reads in high coverage regions of the genome  
418 are also not analysed by default, defined as regions with a mean depth  $\geq 200$  (‘--  
419 mode pe’) or  $\geq 150$  (‘--mode pacbio’ or ‘--mode nanopore’).



420

## 421 [Genome coverage](#)

422 Dysgu collects several quality control metrics for use as features in the machine  
423 learning model. Genome coverage is calculated according to (29), except coverage  
424 is binned into 10 bp non-overlapping segments. The genome coverage tracks are  
425 saved in the temp folder during execution.

426

## 427 [Alignment clustering](#)

428 Reads are initially clustered using an edge-coloured undirected graph  $G$ . Nodes in  
429 the graph represent SV-signatures and correspond to events listed in the cigar field  
430 of an alignment, or the properties of a read. SV-signatures are enumerated as either  
431 'discordant', 'split', 'deletion', 'insertion' or 'breakend', and are associated with a  
432 'genomic-start' and 'genomic-end' position. 'Breakend' types indicate a read that has  
433 a normal mapping orientation and no supplementary mappings, but has a soft-  
434 clipped sequence, which potentially corresponds to an unmapped breakpoint. Edges  
435 correspond to either 'white edges' that link together all alignments in a template with  
436 the same query name, or 'black' edges that are added between nodes that share a  
437 compatible SV signature.

438 Clustering is split into two phases. Initially, genomic reads are converted into a series  
439 of SV-signatures, with each item corresponding to a separate candidate event. For  
440 example, a deletion identified in the alignment cigar, a discordant read, or a read  
441 with an unmapped soft-clipped are converted into SV-signatures as nodes in  $G$ .

442 The local genomic region is then searched for events with a compatible signature.  
443 We use a red-black tree to search for items with a similar 'genomic end' position  
444 before checking if the 'genomic start' position is also similar. A search depth of 4 is  
445 used to search forwards and backwards in the data structure for other nodes. We  
446 find that using the 'genomic end' position permits a shallow search depth as  
447 datapoints are often sparser at the distant 'genomic end' position. Edges are not  
448 permitted between 'deletion' or 'insertion' types, although edges between other types  
449 are allowed.

450 When searching for other nodes to add 'black' edges between, nodes that are closer  
451 in the genome to the query are preferred, so if multiple candidates are found, edges  
452 are only formed between nodes passing a more stringent threshold. SV-signatures

453 are checked to make sure that they have a reciprocal overlap of 0.1, and a  
454 separation distance between ‘genomic start’ and ‘genomic end’ positions below a  
455 clustering threshold. For PE reads, the clustering threshold is  $< insert\ median +$   
456  $(5 \cdot insert\ stdev) bp$ , while for PacBio the threshold is  $< 35 bp$ , and ONT  $< 100 bp$ . If  
457 another SV-signature is found with a ‘genomic start’  $< 35 bp$ , these nodes pass the  
458 more stringent threshold, and a ‘black’ edge is added to the graph. For single-end  
459 reads or ‘split’ reads, if any of these conditions fail we also check the span position  
460 distance (26) between signatures. Span position distance between signatures  $S_1$  and  
461  $S_2$  is defined as  $SPD = SD(S_1 + S_2) + \frac{PD(S_1 + S_2)}{N}$  where SD is the span distance  
462 between signatures  $SD = \frac{|(E_1 - B_1) - (E_2 - B_2)|}{\max(E_1 - B_1, E_2 - B_2)}$ , and PD is the position distance  
463  $\min(|B_1 - B_2|, |E_1 - E_2|, \left| \frac{B_1 + E_1}{2} - \frac{B_2 + E_2}{2} \right|)$ . N is a normalization constant which is set  
464 at 100 for PE reads, 600 for PacBio and 900 for ONT reads. For all read types the  
465 SPD threshold used is  $t < 0.3$ . For PE reads that do not have a ‘split’ SV signature,  
466 we use a modified formula, only adding ‘black’ edges between nodes if  
467  $\frac{PD}{\max(E_1 - B_1, E_2 - B_2)} < t$  and  $SD < t$ .

468 If no edges are found for a PE read, a second phase of clustering is used to try and  
469 find edges between reads that share similar soft-clipped sequences. As pairwise  
470 sequence comparison between neighbouring alignments is computationally costly,  
471 we devised a novel algorithm based on clustering of the minimizer sketch of soft-  
472 clipped reads (30). Minimizer sampling involves computing the list of minimum kmers  
473 derived from consecutive windows over a sequence. We use a kmer length of 6 and  
474 a window length of 12. The minimum kmer is selected using a hash function and  
475 computed in linear-time  $O(n)$  (31). Additionally, in a modification of the minimizer  
476 sketching algorithm, we compute only the unique set of minimum kmers  $S_k$  for each  
477 soft-clipped portion of a read. Each kmer in the set  $S_k$  is associated with a genomic  
478 position that corresponds to the left-most or right-most base in the alignment for left  
479 or right soft-clipped sequences, respectively.

480 Kmers are added to a hashmap  $M$  with the key given by the kmer hash, and the  
481 value pair corresponding to a set of tuples, of (genomic position, read name). Kmers  
482 that are  $> 150 bp$  from the query genomic position are dynamically removed from the  
483 hashmap during processing.

484 For each incoming read, the kmer set  $S_k$  is first computed, then for each kmer a  
485 corresponding set  $Z$  of reads and genomic positions is obtained by indexing  $M$ . The  
486 set  $Z$  consists of a collection of local reads that share the same minimizer kmer as  
487 the query. Entries in  $Z$  are then compared to the current genomic position and if the  
488 separation is  $< 7$  bp, the number of found minimizers  $a$  is incremented. Additionally,  
489 the number of minimizers shared between reads with the same name  $b$  is counted.  
490 The total minimizer support is defined as  $(\frac{a}{2} + b)$  and a threshold of  $\geq 2$  is utilized.  
491 Once the minimizer support threshold is exceeded, found nodes are added to a set  
492 and returned.  
493 Finally, 'black' edges are added to the graph between the returned set of nodes and  
494 the query node. Utilizing the minimizer clustering algorithm, pairwise sequence  
495 alignment is avoided, instead sequence matches between two sequences can be  
496 inferred from computing a minimizer sketch and utilizing hashmap queries.

497

#### 498 [Event partitioning](#)

499 Once all alignments have been added into the main graph  $G$ , the graph is simplified  
500 to a undirected quotient graph  $Q = (V_q, E_q)$  whose vertices consists of blocks or  
501 partitions of vertices from the main graph  $G$ . The vertices (partitions)  $V_q$  are found by  
502 finding connected components in  $G$  using 'black' edges only. Edges  $E_q$  are then  
503 defined between partitions using 'white' edge information from  $G$ , thus linking  
504 together read templates that map one or more SV.

505 Connected components in  $Q$  are processed together. These components can be  
506 composed of one or more partitions, harbouring potentially multiple SV events. In the  
507 simplest case, a component will consist of a single partition, which is processed for  
508 one or more SV. Components with a single edge are processed for a single SV only.  
509 For components with multiple edges, each edge is processed for a single SV, and  
510 additionally, each node partition is processed as a single partition if the number of  
511 'black' intra-partition edges exceeds the number of 'white' out-edges, according to  
512 the main graph  $G$ . Thus, all components of  $Q$  are processed as a series of single-  
513 edges or single-partitions.

514 Single-edges in  $Q$  are assumed to represent a single SV, with reads from the  $u$   
515 partition corresponding to one breaksite and reads from the  $v$  partition corresponding  
516 to the other. Single-partition nodes are assumed to map a single SV if a spanning

517 alignment is found (e.g., a deletion event in the alignment cigar field). If no-spanning  
518 alignments are found, reads in the single-partition are further clustered using  
519 hierarchical clustering with the Nearest Point Algorithm (32), using the genomic start  
520 and end points of reads in the partition. This step is helps disentangle SVs with large  
521 overlaps and similar reference coordinates. Identified sub-clusters are then  
522 processed for a single SV.

523

#### 524 Consensus sequence generation

525 We generate consensus sequences at each breakpoint, from which read properties  
526 can be derived, such as repeat score or expanded polymer bases (see SV metrics  
527 section for further details), and to determine soft-clipped sequences for potentially  
528 remapping to the reference genome. We utilize a novel algorithm that borrows  
529 concepts from the positional de Bruijn graph (33), and partial order alignment graphs  
530 (POA) (34). In a positional de Bruijn graph  $G$ , the vertex set  $V$  encodes each  
531 sequence kmer in addition to genomic location, which helps leverage information  
532 provided by the mapper and localizes assembly. Edges  $E$  are permitted between  
533 kmers adjacent in the reference genome, which generally leads to a directed acyclic  
534 graph. However, it is possible that some bases do not have a genomic location, such  
535 as insertions within a read, or soft-clipped sequence. In such cases, genomic  
536 location can be inferred, for example using the expected mapping position if the  
537 whole read was aligned without gaps (10).

538 Partial order alignment graphs (34) are used to perform multiple sequence  
539 alignments, with vertices representing bases, and edges added between  
540 neighbouring bases in a sequence. Additional Sequences can be pairwise-aligned  
541 and incorporated into a POA using dynamic programming, and a consensus can be  
542 extracted by back-tracing through the maximum weighted path (34).

543 In our algorithm, we also represent vertices as bases and employ back-tracing  
544 through the longest path. However, similar to a positional de Bruijn graph, we take  
545 the ordering of the graph from the genomic locations determined by the mapper.  
546 Utilizing this approach gives an approximation of a multiple sequence alignment  
547 between local genomic reads, and makes usage of information given by the mapper,  
548 whilst being simple and efficient to compute.

549 Let vertices correspond to a tuple  $(b_i, i, f, c) \in V$ , where  $b_i$  is the base aligned at  
550 genome position  $i$ ,  $i$  is the genome position,  $f$  is an offset describing the distance to  
551 the closest aligned base, and  $c$  is a flag to indicate if the base is part of a left or right  
552 soft-clip (or neither). For left soft-clipped bases  $c = 1$ , right soft-clipped bases  $c = 2$ ,  
553 whilst  $c = 0$  otherwise. Bases that are not aligned to the reference genome may thus  
554 belong to three categories, when  $f > 0$ , for insertions  $c = 0$ , for left soft-clips  $c = 1$ ,  
555 and for right soft-clips  $c = 2$ .

556 Edges are added between adjacent bases in a sequence  $(u_j, v_{j+1})$ , and vertices are  
557 weighted according to the sum of base qualities for a given node. Graph construction  
558 leads to a directed acyclic graph, that is then topologically sorted in linear time (35).

559 To read the consensus sequence, the graph is first traversed using breadth-first  
560 search and for each vertex  $v$ , the longest path ending at  $v$  is determined by choosing  
561 the highest scoring predecessor vertex and adding to the running total. The  
562 consensus sequence is read by back-tracing from the vertex with the highest score,  
563 and recursively selecting the best predecessor node.

564 The worst-case time complexity for consensus sequence generation is linear with the  
565 number of input sequence bases. This follows, as graph construction, topological  
566 sorting, breadth-first search and back-tracing all have worst case complexities of  
567  $O(V + E)$  time.

568

### 569 Consensus sequence quality trimming

570 For the described consensus sequence algorithm, problems can arise at unmapped  
571 bases (e.g. soft-clipped sequences) if the underlying reads have a high indel error  
572 rate. In this situation, indels in unaligned bases cause neighbouring sequences to be  
573 shifted out of sync and can result in collapsing of indel errors in the consensus  
574 sequence. To address this problem, we trim soft-clipped sequences at bases with an  
575 alternative high scoring path. For each node  $v$  on the consensus path, with  
576 predecessor  $u$  and successor  $w$  also on the consensus path, a path quality metric is  
577 calculated.  $I_{total}$  is defined as the total weight of all incoming edges to  $v$ . The in-edge  
578 quality is defined as  $q_{in} = \frac{I(u,v)}{I_{total}}$ , where  $I(u,v)$  is the weight of the consensus path  
579 edge  $(u, v)$ . Similarly,  $O_{total}$  is defined as the total weight of all outgoing edges from  
580  $v$ . The out-edge quality is defined as  $q_{out} = \frac{O(v,w)}{O_{total}}$ , where  $O(v,w)$  is the weight of

581  $(v, w)$ . The path quality metric for  $v$  is defined as  $P_q = \min(q_{in}, q_{out})$ . Soft-clipped  
582 sequences are trimmed at bases with a path quality metric  $< 0.5$ .

583 The soft clip weight (scw) parameter is defined for subsequent filtering, as the total  
584 base quality of nodes in the soft-clipped portion of the sequence divided by the  
585 length of the soft-clip.

586

### 587 Re-mapping of contigs

588 After generating consensus sequences, if an end co-ordinate could not be  
589 determined, an attempt is made to align the soft-clipped sequence to the reference  
590 genome. Soft-clipped sequences are remapped to a window  $\pm 500$  bp from the  
591 anchored breakpoint. We utilize edlib (36) (parameters: mode="HW") to find an  
592 approximate location, before refining the alignment using Striped Smith-Watermen  
593 (37) (parameters: match\_score=2, mismatch\_score=-8, gap\_open\_penalty=6,  
594 gap\_extend\_penalty=1) using the scikit-bio library (found online at: <http://scikit-bio.org/>). For deletion events, if less than 40 % of the soft-clip could be remapped  
595 and the alignment span is  $< 50$ bp, the alignment is rejected. For insertion events, if  $>$   
596 20 bp of sequence could not be mapped the alignment is rejected.

597  
598 If no alignment is identified, dysgu can still call an unanchored insertion event at the  
599 identified break point, however, only events that have support  $> \text{min\_support} + 4$  and  
600 a soft-clip length  $\geq 18$  bp. The min\_support parameter can be user supplied and  
601 takes a value of 3 for PE data or 2 for LR data.

602

### 603 Sequence repeat score

604 Dysgu calculates repetitiveness scores for aligned regions of contigs as well as  
605 reference bases between deletions, and soft-clipped sequences. To calculate this  
606 metric, the sequence of interest is broken into kmers of increasing lengths from 2 – 6  
607 bases. For each kmer of length  $k$ , a hashtable is used to record the last seen  
608 position of each kmer. If a kmer is seen more than once, the distance in bases to the  
609 last seen position is retrieved  $d$ . The repeat score is then calculated as a mean  
610 according to  $\frac{1}{n} \left( \sum \frac{kx}{m} \right)$  where  $k$  is the kmer length, and  $x$  and  $m$  have the form  $v \cdot e^{-\frac{\lambda}{k}}$ ,  
611 where  $e$  is Euler's number,  $\lambda$  is a decay constant set at 0.25, and  $v = k$  for the

612 denominator  $m$ , and  $v = d$  for  $x$ . For perfect tandem repeats  $\frac{kx}{m} = 1$ , whilst  
613 sequencing errors, interspersed patterns or random sequence lead to lower values.

614

### 615 Base quality score correlation at soft-clipped reads

616 For short-read input data we calculate a metric referred to as 'soft-clip quality  
617 correlation' (SQC), which is aimed at quantifying a sequence-specific error profile we  
618 observed in Illumina data (38). During sequencing, it is thought that certain genomic  
619 sequences can promote dephasing, that gives rise to read base-qualities that  
620 correlate with the underlying sequence, and can result in frequent mismatches in  
621 alignments at specific bases (38). In our data, we observed a pattern consistent with  
622 this model but occurring at soft-clipped reads. These sites were frequently identified  
623 adjacent to homopolymer sequences and displayed base-quality scores that  
624 fluctuated with the underlying soft-clipped sequence. These soft-clip sequences  
625 often appeared to contain many errors as neighbouring soft-clipped reads showed  
626 many differences. Finally, these sites also frequently gave rise to false-positive calls  
627 at one-end anchored SV calls. The SQC metric was devised to quantify this  
628 phenomenon and is utilized as a feature in machine learning classification.

629 For each query read from the putative SV, the quality values of soft-clipped bases  
630 are added to a hashmap  $H$ , with the relative genomic position  $pos$  as the key, and a  
631 list  $L_{pos}$  of base-qualities as values. The relative genomic position is taken as the  
632 position of the base if the whole soft-clipped portion of the read was mapped to the  
633 genome. Once all reads have been added, the 'local mean' is calculated as the  
634 absolute difference from the mean of each list  $d_{pos} = |x_j - \mu|$  where  $x_j$  is each item  
635 in  $L_{pos}$  and  $\mu$  is the mean of  $L_{pos}$ . The sum of all calculated values of  $d_{pos}$  is stored in  
636 a variable  $v_{local} = \sum d_{pos}$ , and the global mean across all  $d_{pos}$  is calculated  $m =$   
637  $\frac{v_{local}}{n}$ . Finally, for each list in  $H$ , the sum of differences with the global mean is  
638 calculated  $v_{global} = \sum |x_j - m|$ . The SQC metric is calculated as the ratio  $sqc =$   
639  $\frac{v_{local}}{v_{global}}$ . When the positions of low-quality bases are distributed randomly with  
640 genomic position  $sqc$  values will be close to 1.0. However, when low quality bases  
641 are clustered at certain positions, this results in smaller differences in base qualities  
642 at the local scale, giving smaller  $v_{local}$  values and lower  $sqc$  values.

643



#### 644 **Fold change in coverage across SVs**

645 We calculate the fold change in coverage (FCC) across putative SVs according to  
646 (39) with minor modifications. We utilize a genomic bin size of 10 bp and analyse 1  
647 kb sequence flanking the left and right breaksites. The fold change in coverage is  
648 calculated as the median coverage of the interior SV region divided by the median of  
649 the flanking sequence. The FCC metric was the most important feature after SV  
650 length for classifying SVs by machine learning, however we considered that this  
651 metric may not be suitable for non-diploid samples, or complex clonal mixtures such  
652 as those encountered during tumour sequencing, as lower allelic fractions only give  
653 rise to small changes in FCC. For this reason, we also provide an additional  
654 machine-learning model for use with non-diploid or complex tumour SV discovery.

655

#### 656 **Polymer repeats at breaksites**

657 Dysgu searches for simple repeat patterns with a unit length of 1-6 bp that directly  
658 overlap a break. These sites could arise from the joining of directed repeats (e.g.  
659 deletion event) or by the extension of the polymer at the break (e.g. insertion), or  
660 perhaps a more complex event. The length of the identified repeat sequence and the  
661 stride of the simple repeat are also utilized as features in the machine learning  
662 model.

663 For each base in the input sequence, a search is initiated for a repeat pattern  
664 starting at that base. Repeat lengths  $l$  of between 1-6 bp are tested in increasing  
665 length. To identify a repeat pattern, successive kmers are tested for identity with the  
666 starting kmer, using a step size of  $l$ . If a matching kmer is found the count  $c$  is  
667 incremented. If  $> 3$  non-matching kmers or  $> 1$  successive non-matching kmer is  
668 found the search is stopped. If  $c \geq 3$  when the search is stopped, and the spanning  
669 sequence identified is  $> 10$  bp, the repeat sequence is set aside. Finally, if the repeat  
670 sequence overlaps the breaksite then the SV event is annotated with the breaksite  
671 repeat and stride length.

672

#### 673 **SV event metrics**

674 Dysgu annotates each putative SV event with a number of metrics. In Table 7, we list  
675 metrics utilized in the diploid paired-end model by decreasing feature importance.

| Abbreviation | Long name | Description |
|--------------|-----------|-------------|
|--------------|-----------|-------------|



|                |                                         |                                                                                                                                                                                                                                                                                                                                             |
|----------------|-----------------------------------------|---------------------------------------------------------------------------------------------------------------------------------------------------------------------------------------------------------------------------------------------------------------------------------------------------------------------------------------------|
| <b>SVLEN</b>   | SV length                               | The length in base-pairs of the SV                                                                                                                                                                                                                                                                                                          |
| <b>FCC</b>     | Fold change in coverage                 | A measure of the change in sequencing coverage across the SV                                                                                                                                                                                                                                                                                |
| <b>SU</b>      | Support                                 | The total evidence in terms of reads supporting the SV                                                                                                                                                                                                                                                                                      |
| <b>RMS</b>     | Re-mapping score                        | The alignment score of the re-mapped soft-clipped sequence for one-end anchored SVs                                                                                                                                                                                                                                                         |
| <b>CMP</b>     | Compressibility                         | The mean compressibility of both consensus sequences, defined as the compressed sequence length divided by the length of the uncompressed sequence. Zlib is used as the sequence compressor.                                                                                                                                                |
| <b>BCC</b>     | Bad clip count                          | The number of reads within 500 bp of breaksites that do not have a high quality soft-clip. A sliding window of 10 bp is used to scan soft-clip sequences. If the average base quality of the window is > 10, a counter is incremented. If ≥ 15 windows are found above this threshold, the read is deemed to have a high quality soft-clip. |
| <b>NEIGH10</b> | Neighbours within 10 kb                 | The total number of neighbouring break points within 10 kb of each end of the SV.                                                                                                                                                                                                                                                           |
| <b>REPSC</b>   | Repeat score for soft-clipped sequences | The mean repeat score for the soft-clipped portion of consensus contigs. See the “Repeat score calculation” section for details.                                                                                                                                                                                                            |
| <b>MCOV</b>    | Maximum sequence coverage within 10 kb  | The maximum sequencing coverage within 10 kb of SV breaksites                                                                                                                                                                                                                                                                               |
| <b>SWC</b>     | Soft-clip weight                        | The average base quality weight of the soft-clipped portion of consensus contigs. See the “Consensus sequence generation” section for more details.                                                                                                                                                                                         |
| <b>RB</b>      | Reference bases                         | The total number of reference-aligned bases in                                                                                                                                                                                                                                                                                              |

|               |                                          |                                                                                                                                                                                                                           |
|---------------|------------------------------------------|---------------------------------------------------------------------------------------------------------------------------------------------------------------------------------------------------------------------------|
|               |                                          | consensus sequences                                                                                                                                                                                                       |
| <b>RAS</b>    | Reverse soft-clip to alignment score     | The soft-clipped portion of a consensus contig is reverse complemented and aligned to the reference-aligned portion of the contig. RAS is the score of any alignment found using Striped Smith-Waterman using scikit-bio. |
| <b>MAPQP</b>  | Map quality primary                      | The mean mapping score of primary alignments.                                                                                                                                                                             |
| <b>RR</b>     | Reference repeat score                   | For deletion events < 150 bp, the repeat score for the deleted reference sequence is calculated. See the “Repeat score calculation” section for details.                                                                  |
| <b>COV</b>    | Mean coverage within 10 kb               | The mean sequencing coverage within 10 kb of both break sites.                                                                                                                                                            |
| <b>FAS</b>    | Forward soft-clip to alignment score     | The soft-clipped portion of a consensus contig is aligned to the reference-aligned portion of the contig. FAS is the score of any alignment found using Striped Smith-Waterman using scikit-bio.                          |
| <b>SQC</b>    | Soft-clip quality correlation            | See the section “Base quality score correlation at soft-clipped reads”                                                                                                                                                    |
| <b>SVTYPE</b> | Structural variant type                  | The major SV category, DEL – deletion, INS – insertion, INV – inversion, DUP – duplication, TRA – translocation.                                                                                                          |
| <b>NP</b>     | Normal pairs                             | The total number of reads with a ‘normal’ mapping orientation and spacing determined by the mapper                                                                                                                        |
| <b>GC</b>     | GC %                                     | The mean GQ percentage of consensus contigs                                                                                                                                                                               |
| <b>NEXP</b>   | Number of expanded repeat bases at break | See the “Repeat expansion at break sites” section                                                                                                                                                                         |
| <b>REP</b>    | Repeat score of aligned bases            | The mean repeat-score of reference-aligned sections of consensus contigs. See the “Repeat score calculation” section for details.                                                                                         |

|                |                             |                                                                                                                                                                                    |
|----------------|-----------------------------|------------------------------------------------------------------------------------------------------------------------------------------------------------------------------------|
| <b>NMP</b>     | Mean NM score or alignments | Mean edit-distance of primary alignments supporting the variant, determined by the mapper                                                                                          |
| <b>BND</b>     | Number of break-end reads   | The total number of reads with a breakend signature, arising when a PE read is mapped in a normal orientation with no supplementary mappings, but also has a soft-clipped sequence |
| <b>MAS</b>     | Maximum alignment score     | Maximum alignment score of supplementary reads supporting the variant                                                                                                              |
| <b>STRIDE</b>  | -                           | The unit size in bp of the polymer extension sequence at the break site                                                                                                            |
| <b>MS</b>      | Minus strand                | The total number of reads found on the minus strand                                                                                                                                |
| <b>NMB</b>     | -                           | Mean edit distance excluding gaps $\geq 30$ bp                                                                                                                                     |
| <b>OL</b>      | Overlap                     | The overlap in bp of query alignments from each breaksite                                                                                                                          |
| <b>RED</b>     | Re-map edit distance        | The edit distance of the re-mapped soft-clip sequence                                                                                                                              |
| <b>PS</b>      | Plus strand                 | The total number of reads found on the plus strand                                                                                                                                 |
| <b>NEIGH</b>   | Neighbours                  | The number of other putative breakpoints within 1 bp of the current SV                                                                                                             |
| <b>WR</b>      | Within-read support         | The number of reads with an alignment gap supporting the SV                                                                                                                        |
| <b>RPOLY</b>   | Reference polymer           | Number of polymer bases identified in the reference-aligned portion of consensus contigs                                                                                           |
| <b>CIPOS95</b> | Confidence-interval         | The confidence-interval around the POS breaksite                                                                                                                                   |
| <b>MAPQS</b>   | Map-quality supplementary   | The mean mapping quality of supplementary alignments                                                                                                                               |
| <b>SC</b>      | Soft-clips                  | Number of reads with soft-clips supporting the variant                                                                                                                             |
| <b>SR</b>      | Split-reads                 | Number of split-reads supporting the variant                                                                                                                                       |
| <b>BE</b>      | Block edge                  | Categorical variable indicating if the component                                                                                                                                   |

|            |                        |                                                                                |
|------------|------------------------|--------------------------------------------------------------------------------|
|            |                        | of the quotient graph from which the call was made, had an edge                |
| <b>NDC</b> | Number of double clips | The number of reads that had left and right soft-clips                         |
| <b>STL</b> | Short template length  | The number of reads that displayed an insert size below the 0.05 % percentile. |

676

677 Table 7. Overview of the features used in machine learning classification.

678

### 679 Classifier training

680 To train a machine learning classifier for the different read-types (PE, PacBio and  
 681 ONT) we constructed several 'gold-sets'. Gold-sets consisted of manually curated  
 682 SV loci or SV loci found using other calling software. Primarily, gold-sets were based  
 683 on the well-studied HG001 sample (Female, Western European ancestry). However,  
 684 for PacBio data, gold-sets were also derived from the HG005 sample (Male, Chinese  
 685 ancestry). The read data utilized in constructing the gold-sets are listed in Table 8.

686

687

| Sample | Read type                           | Alignment information              | Coverage | Source                                                                                                                                                                                                                                                       |
|--------|-------------------------------------|------------------------------------|----------|--------------------------------------------------------------------------------------------------------------------------------------------------------------------------------------------------------------------------------------------------------------|
| HG001  | PacBio<br>Sequel II<br>11kb library | GRCh37<br>minimap2<br>GRCh37 ngmlr | 5-6      | SRA accession<br>SRR9001772                                                                                                                                                                                                                                  |
| HG001  | ONT                                 | GRCh37<br>minimap2                 | 13       | SRA accession<br>SRR10965087                                                                                                                                                                                                                                 |
| HG001  | Illumina 148<br>bp x2 HiSeq<br>2500 | GRCh37 bwa<br>mem                  | 40<br>20 | <a href="ftp://ftp-trace.ncbi.nlm.nih.gov/giab/ftp/data/NA12878/NIST_NA12878_HG001_HiSeq_300x/RMNISTHS_30xdownsample.bam">ftp://ftp-trace.ncbi.nlm.nih.gov/<br/>giab/ftp/data/NA12878/<br/>NIST_NA12878_HG001_HiSeq_300x/<br/>RMNISTHS_30xdownsample.bam</a> |
| HG001  | PacBio CCS                          | GRCh37<br>minimap2                 | 24       | <a href="ftp://ftp-trace.ncbi.nlm.nih.gov/giab/ftp/data/NA12878/NA12878_PacBio_MtSinai/merged_ec_output_primary.bam">ftp://ftp-trace.ncbi.nlm.nih.gov/<br/>giab/ftp/data/NA12878/<br/>NA12878_PacBio_MtSinai/<br/>merged_ec_output_primary.bam</a>           |

|       |                                     |                    |     |                             |
|-------|-------------------------------------|--------------------|-----|-----------------------------|
| HG005 | PacBio<br>Sequel II<br>11kb library | GRCh38<br>minimap2 | 5-6 | SRA accession<br>SRR9001776 |
|-------|-------------------------------------|--------------------|-----|-----------------------------|

688

689 Table 8. Overview of datasets used in model training.

690

691 The overall strategy was to quantify dysgu performance on smaller subsets of data,  
692 and then combine these smaller benchmarks into a larger set for training. We  
693 employed this strategy as it meant that manual curation of smaller subsets was more  
694 feasible (as opposed to annotating events genome wide), and also multiple methods  
695 for annotating true-positive calls could be integrated into the training set e.g. relying  
696 on manual curation, labelling using a third party SV caller, or utilizing previously  
697 published call sets, or utilizing different DNA mappers.

698 Firstly, we constructed a gold-set based on PacBio Sequel II reads. Nanovar was run  
699 on HG001 minimap2-aligned reads and insertion calls from chr1 and chr10 in the  
700 size range 30-500 bp were added to the set (n=1808). The choice of chromosome to  
701 utilize was arbitrary. We also utilized a previously published list of deletion and  
702 insertion calls made using pbsv (n=27662) on PacBio CCS data at around 30x  
703 coverage (downloaded from GIAB [ftp://ftp-](ftp://ftp-trace.ncbi.nlm.nih.gov/giab/ftp/data/ChineseTrio/analysis/PacBio_pbsv_05212019/HG005_GRCh38.pbsv.vcf.gz)  
704 [trace.ncbi.nlm.nih.gov/giab/ftp/data/ChineseTrio/analysis/PacBio\\_pbsv\\_05212019/H](ftp://ftp-trace.ncbi.nlm.nih.gov/giab/ftp/data/ChineseTrio/analysis/PacBio_pbsv_05212019/HG005_GRCh38.pbsv.vcf.gz)  
705 [G005\\_GRCh38.pbsv.vcf.gz](ftp://ftp-trace.ncbi.nlm.nih.gov/giab/ftp/data/ChineseTrio/analysis/PacBio_pbsv_05212019/HG005_GRCh38.pbsv.vcf.gz)).

706 Next we added a collection of manually curated SV loci that were identified by  
707 visually inspecting calls made by dysgu using the Integrative Genomics Viewer (IGV)  
708 (40). Multiple read-types were assessed, simultaneously viewing alignments of  
709 PacBio Sequel II, PacBio CCS and ONT reads. If the SV showed support in more  
710 than one technology the SV loci was labelled as true. If a call made by dysgu was  
711 plausible, but showed strong evidence of being below the minimum size threshold <  
712 30 bp, then the call was labelled as false. All deletion and insertion calls for chr1,  
713 10 and 11 for HG001 minimap2-aligned reads were manually labelled in this way  
714 (n=2973). Additionally, large insertion calls (“large-INS”) made by dysgu ( $\geq$  500 bp,  
715 whole genome) using HG001 minimap2 and ngmlr aligned reads were also  
716 assessed (n=1661). Calls made by dysgu were then compared to these smaller

717 benchmark sets separately and labelled as true or false using SVBench (available  
718 online at <https://github.com/kcleal/svbench>).

719 These smaller benchmarks were then concatenated before training a gradient  
720 boosting classifier using the lightgbm package (28) (boosting type "dart"). Features  
721 were first selected using recursive feature-selection with cross-validation using scikit-  
722 learn (41). Hyperparameters were tuned using grid search with cross-validation  
723 using Stratified K-fold (n=5) (41). The learning-rate, max-bin, max-depth, n-  
724 estimators and number-of-leaves were optimized in this way, whilst other parameters  
725 were left as default.

726 Events labelled using the PacBio classifier with probability  $\geq 0.5$  were then leveraged  
727 to help construct additional gold-sets for PE and ONT read-types. For the PE gold-  
728 set, deletion and insertion loci identified using the PacBio model were taken as true-  
729 positive loci (chromosomes 1, 2, 10, 11, 12, n=8258). Additionally, the "large-INS"  
730 set derived from PacBio reads was utilized. Finally, events called by dysgu using PE  
731 reads (HG001, bwa mem) were manually curated, corresponding to deletions  
732 (n=5984 true) from chromosomes 1 – 5 and 10 – 22, plus insertions (n=2250 true)  
733 from chromosomes 1-14. The choices of chromosomes were arbitrary.

734 For the ONT gold-set, we utilized deletion and insertion loci identified using the  
735 PacBio model (probability  $\geq 0.5$ , whole genome n=25072 true). To this we used  
736 regions identified by Nanovar (n=23581 true), and the "large-INS" manually curated  
737 set. Additionally, we added manually curated dysgu calls from ONT data from chr1  
738 and chr10 (n=4265).

739

#### 740 [Benchmark datasets](#)

741 For the HG002 benchmark, variants were downloaded from GIAB  
742 [ftp://ftptrace.ncbi.nlm.nih.gov/giab/ftp/data/AshkenazimTrio/analysis/NIST\\_SVs\\_Inte](ftp://ftptrace.ncbi.nlm.nih.gov/giab/ftp/data/AshkenazimTrio/analysis/NIST_SVs_Integration_v0.6)  
743 [gration v0.6](ftp://ftptrace.ncbi.nlm.nih.gov/giab/ftp/data/AshkenazimTrio/analysis/NIST_SVs_Integration_v0.6). For HG001, variants were downloaded from GIAB [ftp://ftp-](ftp://ftp-trace.ncbi.nlm.nih.gov/giab/ftp/technical/svclassify_Manuscript/Supplementary_Information/Personalis_1000_Genomes_deduplicated_deletions.bed)  
744 [trace.ncbi.nlm.nih.gov/giab/ftp/technical/svclassify\\_Manuscript/Supplementary\\_Infor](ftp://ftp-trace.ncbi.nlm.nih.gov/giab/ftp/technical/svclassify_Manuscript/Supplementary_Information/Personalis_1000_Genomes_deduplicated_deletions.bed)  
745 [mation/Personalis\\_1000\\_Genomes\\_deduplicated\\_deletions.bed](ftp://ftp-trace.ncbi.nlm.nih.gov/giab/ftp/technical/svclassify_Manuscript/Supplementary_Information/Personalis_1000_Genomes_deduplicated_deletions.bed).

746

#### 747 [Benchmarking SV calls using svbench](#)

748 We developed a python software library "svbench" to facilitate rapid benchmarking of  
749 SV datasets, as well as to facilitate exploration and comparison of SV calls as an

750 aide during software development. Svbench performs a similar role to other  
751 benchmarking programs such as truvari from GIAB (16), although as data structures  
752 can be held in memory and explored interactively, significant speedups can be  
753 obtained for benchmarking which can be helpful during software development and  
754 analysis.

755 Svbench also optionally adds a weighting to input SVs that can be used to break ties  
756 between multiple query and reference SVs. The weighting or “strata” can be  
757 specified during loading of SVs, and usually takes the value of a quality metric set by  
758 the caller, or if this is absent, the variant support in terms of read evidence.  
759 Stratifying SV calls in this way is also necessary to generate a precision-recall curve.  
760 Another difference between svbench and truvari, is that svbench can optionally  
761 classify duplicate true-positive calls, which can arise when one reference SV in the  
762 sample gives rise to multiple calls in the output. There are several ways to classify  
763 duplicates, such as labelling all duplicates as false-positives, true-positives, or  
764 ignoring them from precision calculation. By default, svbench utilizes the latter  
765 option. Although this can lead to optimistic precision and F1 scores, we consider this  
766 approach often leads to a clearer understanding of the underlying performance of an  
767 SV caller. For example, if duplicates are labelled as false-positives then a caller that  
768 identifies the correct genomic loci but has a high duplication rate is penalized, while  
769 a caller that identified incorrect loci but also has a low duplication rate could end up  
770 with a similar overall precision and F1 score. Furthermore, removing duplicates  
771 bioinformatically, might be less of a challenge than removing genuine false positives,  
772 by for example filtering SVs with low weight but found nearby other SVs.

773 Conceptually, svbench loads input files (vcf, bed, bedpe or csv format) into a  
774 ‘CallSet’ object. Internally, SV records are held in a pandas dataframe (42), which  
775 support a rich set of data wrangling capabilities, making common data operations  
776 straightforward such as filtering, splitting, combining, grouping, and plotting  
777 precision-recall curves.

778 To compare one dataset with another i.e. a benchmark dataset with a query dataset,  
779 both sets of SV loci are loaded into an svbench CallSet object. The benchmark  
780 dataset is then prepared by adding intervals (add\_intervals function) around each  
781 breaksite, adding one interval for each start and end coordinate. Intervals are held in  
782 a nested containment list using the ncls library (43). Utilizing an interval at both start  
783 and end sites, rather than a single interval, means translocations can be naturally



784 compared, and for large SVs, nesting of small SV intervals within larger SVs is  
785 avoided which can reduce the search space when comparing records.

786 Query SVs are then checked against prepared intervals. If a benchmark record  
787 overlaps both the start and end of a query SV, and the percent size similarity,  
788 reciprocal overlap and svtype match criteria, then the records are considered to  
789 match. Percent size is defined as  $\frac{\min(size_{ref}, size_{query})}{\max(size_{ref}, size_{query})}$ . Query and benchmark records

790 that pass provided thresholds are then clustered on an undirected graph  $G$ , using the  
791 network library (44).

792 Edges  $(u, v) \in G$  are added to the graph between benchmark vertices  $u$  and query  
793 vertices  $v$  with the edge weight given by the “strata”, or weight property of the query  
794 event, which is parsed during loading of the data. If a query vertex  $v$  matches  
795 multiple benchmark vertices  $u$ , then the chosen benchmark call  $u$  is determined by  
796 the closest absolute genomic distance between  $u$  and  $v$ , defined as  $|start_{query} -$

797  $start_{ref}| + |end_{query} - end_{ref}|$ . Once all query records have been added to the  
798 graph, connected components are then processed. If a benchmark vertex has  
799 multiple edges, a highest scoring edge is selected as the true-positive call, whilst  
800 other query vertices are labelled as duplicates. If duplicate classification is permitted  
801 then precision scores are calculated as  $precision = \frac{true\ positives}{total - duplicates}$ . If duplicate

802 classification is turned off then duplicates are treated as false positives. Recall is  
803 assessed as  $recall = \frac{true\ positives}{true\ positives - false\ negatives}$  and F1 score is calculated as

$$804 \quad F1 = 2 \cdot \frac{precision \cdot recall}{precision + recall}$$

805 We utilized svbench to assess performance of dysgu compared to other SV callers.  
806 For benchmarking calls against the HG002 benchmark (16), we filtered query calls  
807 by a minimum size of 30 bp (whole genome benchmark), or 50 bp (Tier 1  
808 benchmark). We utilized a reference interval size of 1000 bp, and a percent size  
809 similarity threshold of 15 %. Deletion and insertion calls were analysed separately,  
810 filtering both query and reference calls by svtype before comparison. Additionally,  
811 only query calls on the ‘normal’ chromosomes were analysed  $\{chr1..chrY\}$ . To  
812 match the definition of the GIAB benchmark, we converted DUP calls  $< 500$  bp to  
813 insertions.



814 SV callers were applied to datasets using default settings. Version numbers for  
815 tested callers were as follows: dysgu v1.1.4, gatk v4.1.2.0, strelka v2.9.2, manta  
816 v1.6.0, svim v1.3.1, sniffles v1.0.12, nanovar v1.3.2, delly v0.8.5. SV calls were also  
817 filtered by removing calls without a 'PASS' in the filter field (if applicable). The 'strata'  
818 metric utilized for each of the SV callers was as follows: lumpy – "SU", delly –  
819 "QUAL", dysgu – "PROB", manta – "QUAL", strelka – "QUAL", gatk – "QUAL",  
820 nanovar – "QUAL", sniffles – "RE", svim – "SUPPORT". Events with a minimum  
821 support < 2 were filtered out.

822

## 823 Abbreviations

824 SV structural variant, PE paired-end, LR long-read, DEL deletion, DUP duplication,  
825 INV inversion, INS insertion, TRA translocation, ONT Oxford Nanopore  
826 Technologies, GIAB Genome In A Bottle consortium, SRA Sequencing read Archive,  
827 POA partial order alignment.

828

## 829 Data availability

830 Dysgu is released as free and open source under the Massachusetts Institute of  
831 Technology (MIT) licence. Source code and distributions can be downloaded at  
832 <https://github.com/kcleal/dysgu>. Data used to train the classifier is available online at  
833 <https://zenodo.org/record/4761527>. Svbench is also released under the MIT license  
834 and can be found at <https://github.com/kcleal/svbench>. Analysis scripts used to  
835 reproduce results found in this paper can be found under  
836 <https://github.com/kcleal/svbench>. Illumina sequencing data for Ashkenazim HG002  
837 (16) sample was downloaded from GIAB ([ftp://ftp-](ftp://ftp-trace.ncbi.nlm.nih.gov/giab/ftp/data/AshkenazimTrio/HG002_NA24385_son/NIST_Hi)  
838 [trace.ncbi.nlm.nih.gov/giab/ftp/data/AshkenazimTrio/HG002\\_NA24385\\_son/NIST\\_Hi](ftp://ftp-trace.ncbi.nlm.nih.gov/giab/ftp/data/AshkenazimTrio/HG002_NA24385_son/NIST_Hi)  
839 [Seq\\_HG002\\_Homogeneity-10953946/HG002Run01-](ftp://ftp-trace.ncbi.nlm.nih.gov/giab/ftp/data/AshkenazimTrio/HG002_NA24385_son/NIST_Hi)  
840 [11419412/HG002run1\\_S1.bam](ftp://ftp-trace.ncbi.nlm.nih.gov/giab/ftp/data/AshkenazimTrio/HG002_NA24385_son/NIST_Hi)). Two lanes of PacBio data were downloaded from  
841 SRA (<https://www.ncbi.nlm.nih.gov/sra>) under accessions SRR10188368 and  
842 SRR10188369. ONT data were downloaded from SRA under accession  
843 SRR11537600.

844

845

## 846 References

- 847 1. Stankiewicz,P. and Lupski,J.R. (2010) Structural variation in the human genome  
848 and its role in disease. *Annu Rev Med*, **61**, 437–455.
- 849 2. Cleal,K. and Baird,D.M. (2020) Catastrophic Endgames: Emerging Mechanisms of  
850 Telomere-Driven Genomic Instability. *Trends in Genetics*, **36**, 347–359.
- 851 3. Cleal,K., Jones,R.E., Grimstead,J.W., Hendrickson,E.A. and Baird,D.M. (2019)  
852 Chromothripsis during telomere crisis is independent of NHEJ, and consistent  
853 with a replicative origin. *Genome Res.*, **29**, 737–749.
- 854 4. Escudero,L., Cleal,K., Ashelford,K., Fegan,C., Pepper,C., Liddiard,K. and  
855 Baird,D.M. (2019) Telomere fusions associate with coding sequence and copy  
856 number alterations in CLL. *Leukemia*, **33**, 2093–2097.
- 857 5. Turro,E., Astle,W.J., Megy,K., Gräf,S., Greene,D., Shamardina,O., Allen,H.L.,  
858 Sanchis-Juan,A., Frontini,M., Thys,C., *et al.* (2020) Whole-genome  
859 sequencing of patients with rare diseases in a national health system. *Nature*,  
860 **583**, 96–102.
- 861 6. Marshall,C.R., Chowdhury,S., Taft,R.J., Lebo,M.S., Buchan,J.G., Harrison,S.M.,  
862 Rowsey,R., Klee,E.W., Liu,P., Worthey,E.A., *et al.* (2020) Best practices for  
863 the analytical validation of clinical whole-genome sequencing intended for the  
864 diagnosis of germline disease. *npj Genomic Medicine*, **5**, 1–12.
- 865 7. Qin,Y., Koehler,S., Zhao,S., Mai,R., Liu,Z., Lu,H. and Xing,C. (2020) High-  
866 throughput, low-cost and rapid DNA sequencing using surface-coating  
867 techniques. *bioRxiv*, 10.1101/2020.12.10.418962.
- 868 8. Mahmoud,M., Gobet,N., Cruz-Dávalos,D.I., Mounier,N., Dessimoz,C. and  
869 Sedlazeck,F.J. (2019) Structural variant calling: the long and the short of it.  
870 *Genome Biology*, **20**, 246.
- 871 9. Chen,X., Schulz-Trieglaff,O., Shaw,R., Barnes,B., Schlesinger,F., Källberg,M.,  
872 Cox,A.J., Kruglyak,S. and Saunders,C.T. (2016) Manta: rapid detection of  
873 structural variants and indels for germline and cancer sequencing  
874 applications. *Bioinformatics*, **32**, 1220–1222.
- 875 10. Cameron,D.L., Schröder,J., Penington,J.S., Do,H., Molania,R., Dobrovic,A.,  
876 Speed,T.P. and Papenfuss,A.T. (2017) GRIDSS: sensitive and specific  
877 genomic rearrangement detection using positional de Bruijn graph assembly.  
878 *Genome Res*, **27**, 2050–2060.
- 879 11. Khorsand,P. and Hormozdiari,F. (2019) Nebula: Ultra-efficient mapping-free  
880 structural variant genotyper. *bioRxiv*, 10.1101/566620.
- 881 12. Kosugi,S., Momozawa,Y., Liu,X., Terao,C., Kubo,M. and Kamatani,Y. (2019)  
882 Comprehensive evaluation of structural variation detection algorithms for  
883 whole genome sequencing. *Genome Biology*, **20**, 117.

- 884 13. Cameron,D.L., Di Stefano,L. and Papenfuss,A.T. (2019) Comprehensive  
885 evaluation and characterisation of short read general-purpose structural  
886 variant calling software. *Nature Communications*, **10**, 3240.
- 887 14. Sarwal,V., Niehus,S., Ayyala,R., Chang,S., Lu,A., Darci-Maher,N., Littman,R.,  
888 Chhugani,K., Soylev,A., Comarova,Z., *et al.* (2020) A comprehensive  
889 benchmarking of WGS-based structural variant callers. *bioRxiv*,  
890 10.1101/2020.04.16.045120.
- 891 15. Tham,C.Y., Tirado-Magallanes,R., Goh,Y., Fullwood,M.J., Koh,B.T.H., Wang,W.,  
892 Ng,C.H., Chng,W.J., Thiery,A., Tenen,D.G., *et al.* (2020) NanoVar: accurate  
893 characterization of patients' genomic structural variants using low-depth  
894 nanopore sequencing. *Genome Biology*, **21**, 56.
- 895 16. Zook,J.M., Hansen,N.F., Olson,N.D., Chapman,L., Mullikin,J.C., Xiao,C.,  
896 Sherry,S., Koren,S., Phillippy,A.M., Boutros,P.C., *et al.* (2020) A robust  
897 benchmark for detection of germline large deletions and insertions. *Nature*  
898 *Biotechnology*, **38**, 1347–1355.
- 899 17. Parikh,H., Mohiyuddin,M., Lam,H.Y.K., Iyer,H., Chen,D., Pratt,M., Bartha,G.,  
900 Spies,N., Losert,W., Zook,J.M., *et al.* (2016) svclassify: a method to establish  
901 benchmark structural variant calls. *BMC Genomics*, **17**, 64.
- 902 18. Rausch,T., Zichner,T., Schlattl,A., Stütz,A.M., Benes,V. and Korbel,J.O. (2012)  
903 DELLY: structural variant discovery by integrated paired-end and split-read  
904 analysis. *Bioinformatics*, **28**, i333–i339.
- 905 19. Layer,R.M., Chiang,C., Quinlan,A.R. and Hall,I.M. (2014) LUMPY: a probabilistic  
906 framework for structural variant discovery. *Genome Biology*, **15**, R84.
- 907 20. Kim,S., Scheffler,K., Halpern,A.L., Bekritsky,M.A., Noh,E., Källberg,M., Chen,X.,  
908 Kim,Y., Beyter,D., Krusche,P., *et al.* (2018) Strelka2: fast and accurate calling  
909 of germline and somatic variants. *Nature Methods*, **15**, 591–594.
- 910 21. Lex,A., Gehlenborg,N., Strobel,H., Vuillemot,R. and Pfister,H. (2014) UpSet:  
911 Visualization of Intersecting Sets. *IEEE Trans Vis Comput Graph*, **20**, 1983–  
912 1992.
- 913 22. Fang,L., Hu,J., Wang,D. and Wang,K. (2018) NextSV: a meta-caller for structural  
914 variants from low-coverage long-read sequencing data. *BMC Bioinformatics*,  
915 **19**, 180.
- 916 23. Becker,T., Lee,W.-P., Leone,J., Zhu,Q., Zhang,C., Liu,S., Sargent,J.,  
917 Shanker,K., Mil-homens,A., Cerveira,E., *et al.* (2018) FusorSV: an algorithm  
918 for optimally combining data from multiple structural variation detection  
919 methods. *Genome Biology*, **19**, 38.
- 920 24. Zarate,S., Carroll,A., Mahmoud,M., Krasheninina,O., Jun,G., Salerno,W.J.,  
921 Schatz,M.C., Boerwinkle,E., Gibbs,R.A. and Sedlazeck,F.J. (2020)  
922 Parliament2: Accurate structural variant calling at scale. *GigaScience*, **9**.

- 923 25. Sedlazeck,F.J., Rescheneder,P., Smolka,M., Fang,H., Nattestad,M., von  
924 Haeseler,A. and Schatz,M.C. (2018) Accurate detection of complex structural  
925 variations using single-molecule sequencing. *Nature Methods*, **15**, 461–468.
- 926 26. Heller,D. and Vingron,M. (2019) SVIM: structural variant identification using  
927 mapped long reads. *Bioinformatics*, **35**, 2907–2915.
- 928 27. Li,H. (2018) Minimap2: pairwise alignment for nucleotide sequences.  
929 *Bioinformatics*, **34**, 3094–3100.
- 930 28. Ke,G., Meng,Q., Finley,T., Wang,T., Chen,W., Ma,W., Ye,Q. and Liu,T.-Y. (2017)  
931 LightGBM: A Highly Efficient Gradient Boosting Decision Tree. *Advances in*  
932 *Neural Information Processing Systems*, **30**.
- 933 29. Pedersen,B.S. and Quinlan,A.R. (2018) Mosdepth: quick coverage calculation for  
934 genomes and exomes. *Bioinformatics*, **34**, 867–868.
- 935 30. Roberts,M., Hayes,W., Hunt,B.R., Mount,S.M. and Yorke,J.A. (2004) Reducing  
936 storage requirements for biological sequence comparison. *Bioinformatics*, **20**,  
937 3363–3369.
- 938 31. Smith,K.C. (2011) Sliding Window Minimum Implementations.
- 939 32. Virtanen,P., Gommers,R., Oliphant,T.E., Haberland,M., Reddy,T.,  
940 Cournapeau,D., Burovski,E., Peterson,P., Weckesser,W., Bright,J., *et al.*  
941 (2020) SciPy 1.0: fundamental algorithms for scientific computing in Python.  
942 *Nature Methods*, **17**, 261–272.
- 943 33. Ronen,R., Boucher,C., Chitsaz,H. and Pevzner,P. (2012) SEQuel: improving the  
944 accuracy of genome assemblies. *Bioinformatics*, **28**, i188–i196.
- 945 34. Lee,C., Grasso,C. and Sharlow,M.F. (2002) Multiple sequence alignment using  
946 partial order graphs. *Bioinformatics*, **18**, 452–464.
- 947 35. Knuth,D.E. (2011) The Art of Computer Programming: Combinatorial Algorithms,  
948 Part 1 1st ed. Addison-Wesley Professional.
- 949 36. Šošić,M. and Šikić,M. (2017) Edlib: a C/C++ library for fast, exact sequence  
950 alignment using edit distance. *Bioinformatics*, **33**, 1394–1395.
- 951 37. Farrar,M. (2007) Striped Smith–Waterman speeds database searches six times  
952 over other SIMD implementations. *Bioinformatics*, **23**, 156–161.
- 953 38. Nakamura,K., Oshima,T., Morimoto,T., Ikeda,S., Yoshikawa,H., Shiwa,Y.,  
954 Ishikawa,S., Linak,M.C., Hirai,A., Takahashi,H., *et al.* (2011) Sequence-  
955 specific error profile of Illumina sequencers. *Nucleic Acids Res*, **39**, e90.
- 956 39. Pedersen,B.S. and Quinlan,A.R. (2019) Duphold: scalable, depth-based  
957 annotation and curation of high-confidence structural variant calls.  
958 *GigaScience*, **8**.

- 959 40. Robinson,J.T., Thorvaldsdóttir,H., Winckler,W., Guttman,M., Lander,E.S.,  
960 Getz,G. and Mesirov,J.P. (2011) Integrative Genomics Viewer. *Nat*  
961 *Biotechnol*, **29**, 24–26.
- 962 41. Pedregosa,F., Varoquaux,G., Gramfort,A., Michel,V., Thirion,B., Grisel,O.,  
963 Blondel,M., Prettenhofer,P., Weiss,R., Dubourg,V., *et al.* (2011) Scikit-learn:  
964 Machine Learning in Python. *Journal of Machine Learning Research*, **12**,  
965 2825–2830.
- 966 42. McKinney,W. (2010) Data Structures for Statistical Computing in Python. In.  
967 Austin, Texas, pp. 56–61.
- 968 43. Alekseyenko,A.V. and Lee,C.J. (2007) Nested Containment List (NCList): a new  
969 algorithm for accelerating interval query of genome alignment and interval  
970 databases. *Bioinformatics*, **23**, 1386–1393.
- 971 44. Hagberg,A., Schult,D. and Swart,P. (2008) Exploring network structure,  
972 dynamics, and function using NetworkX. In. Proceedings of the 7th Python in  
973 Science Conference, pp. 11–15.
- 974 45. Proceedings of the Python in Science Conference (SciPy): Exploring Network  
975 Structure, Dynamics, and Function using NetworkX.
- 976
- 977
- 978

## 979 Conflict of interest disclosure

980

981 The authors declare that they have no competing interests.

982

## 983 Funding

984

985 Work in the Baird laboratory is funded by Cancer Research UK (A18246/A29202)  
986 and the Wales Cancer Research Centre.

987

## 988 Author contributions

989

990 KC devised methodology, performed experiments, wrote the software and drafted  
991 the manuscript. DMB contributed design ideas, provided feedback and performed  
992 manuscript editing. All authors read and approved the final manuscript.

993

## 994 Figure legends

995

996 Figure 1. Performance of dysgu using 20x PE reads. Dysgu was compared to SV  
997 callers manta, delly and lumpy, and indel callers strelka and gatk, using the HG002  
998 benchmark. Precision-recall curves are shown for all genomic regions (A, B), as well  
999 as high-confidence Tier 1 regions (C, D). The secondary y-axis indicates duplicate  
1000 true-positives (TP) as a fraction of true-positive calls. Intersections and aggregates of  
1001 intersections of SV calls for the all-regions benchmark are displayed using an upset  
1002 plot (E, F). To investigate combinations of SV callers, the union of true-positives  
1003 between callers (labelled concordant), was plotted against the sum of false-positives  
1004 (labelled non concordant) (G, H). The 5 and 10 % non-concordance (NC) is also  
1005 illustrated as a solid or dashed line, respectively.

1006

1007

1008 Figure 2. Performance of dysgu using PacBio reads. Precision-recall curves are  
1009 shown for all genomic regions (A, B), as well as high-confidence Tier 1 regions (C,  
1010 D). Analysis of SV intersections and aggregates of intersections for the all-regions  
1011 benchmark are displayed using an upset plot (E, F). The combinations of SV callers  
1012 was assessed by plotting the union of true-positives (labelled concordant), against  
1013 the sum of false-positives (labelled non concordant) (G, H). The 5 and 10 % non-  
1014 concordance (NC) are shown as a solid or dashed line, respectively.

1015

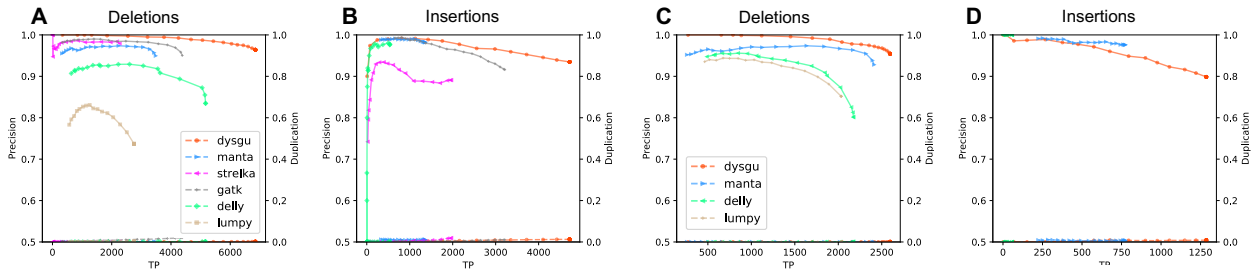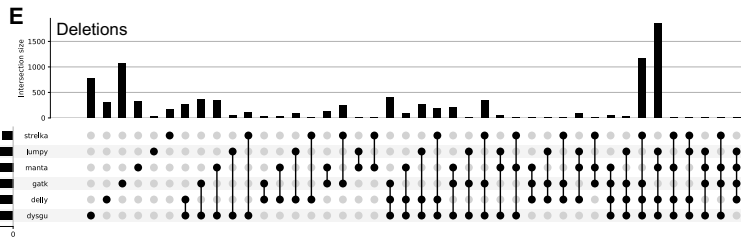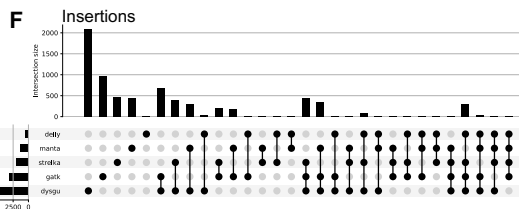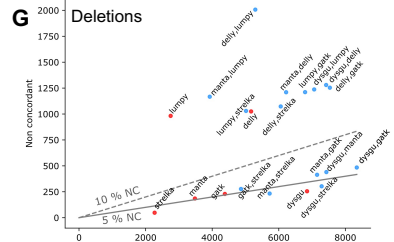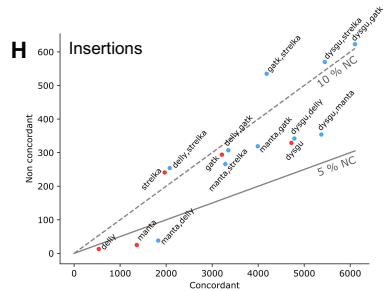

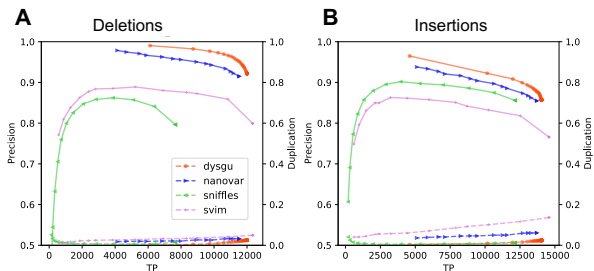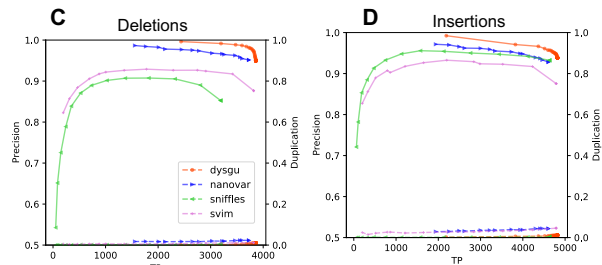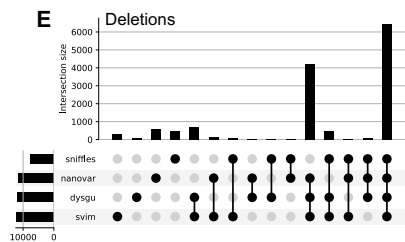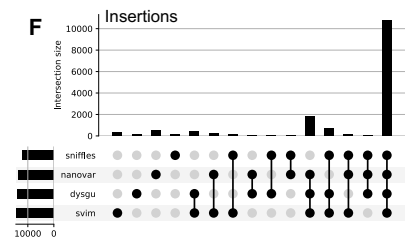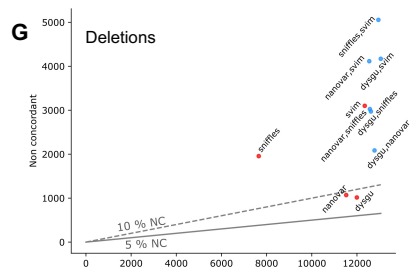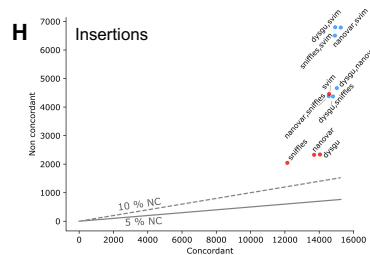

Source: https://www.biorxiv.org/content/10.1101/2021.05.28.446147v1.full.pdf
